# Supplementary material
Source: PubMed Central journal article supplement (PMC5890938)

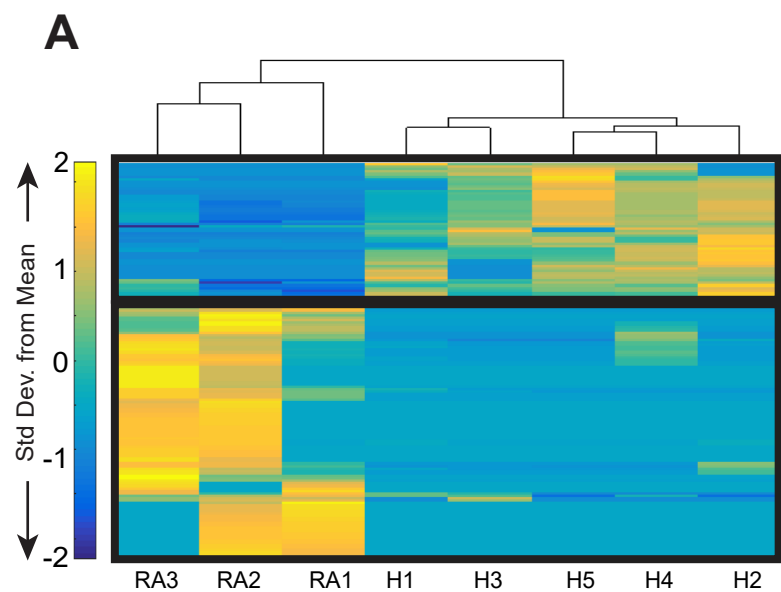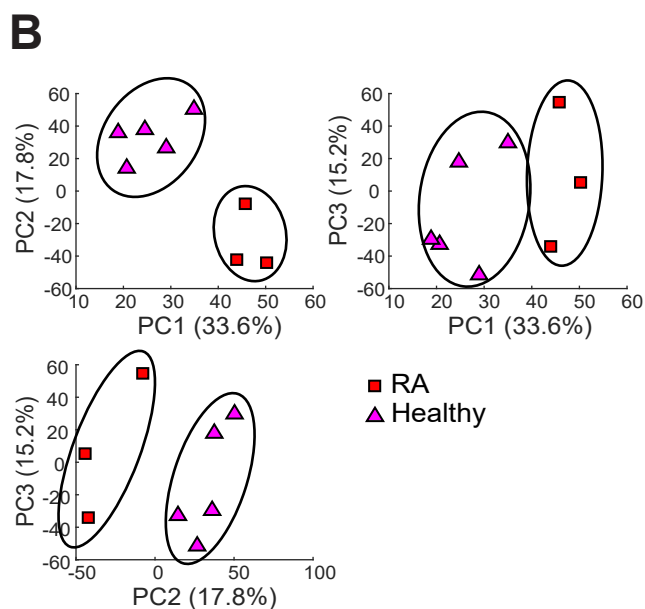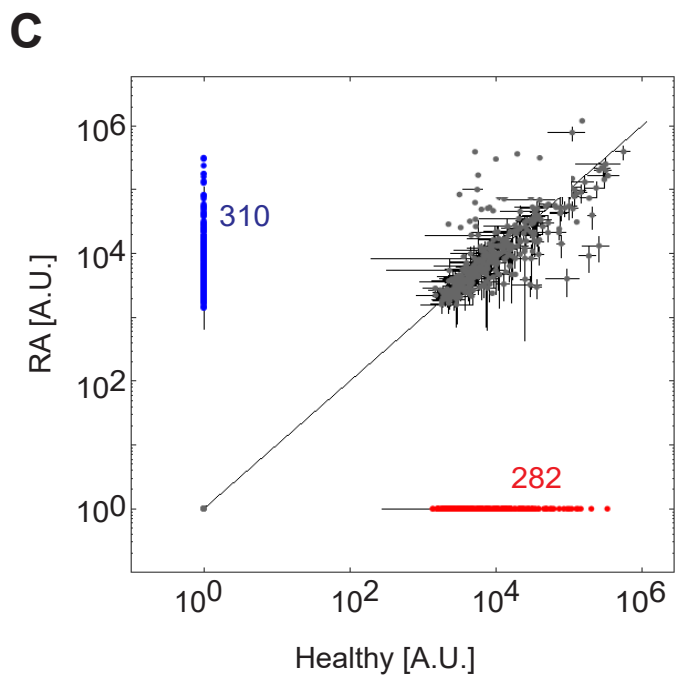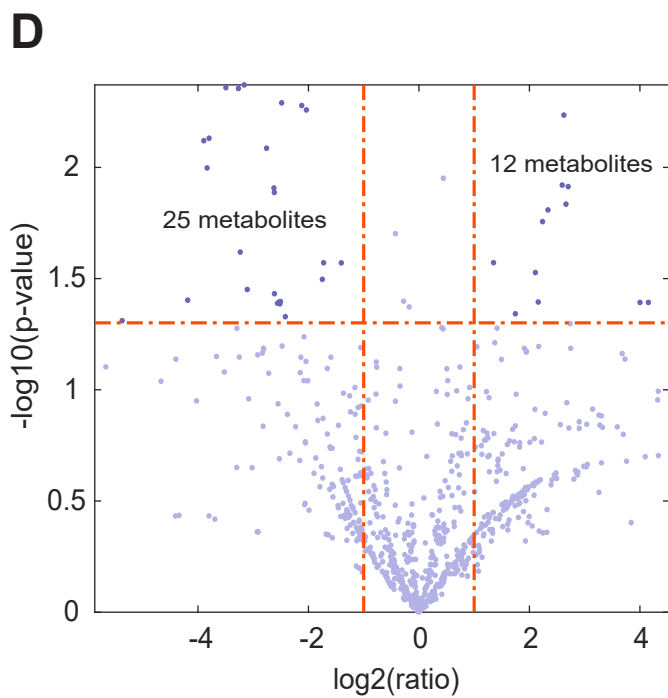

Supplement: NIHMS954572-supplement-1.pdf [file NIHMS954572-supplement-1.pdf]
